# Supplementary material for: Alcohol functionality in the fatty acid backbone of sphingomyelin guides the inhibition of blood coagulation
Source: Royal Society of Chemistry journal article supplement (doi:10.1039/d0ra09218e), 2021-01-01

## Alcohol functionality at fatty acid backbone of sphingomyelin guides the inhibition of blood coagulation

Suman Mallik, Ramesh Prasad, Kaushik Das and Prosenjit Sen\*

School of Biological Science, Indian Association for the Cultivation of Science, 2A & 2B Raja S. C.

Mullick Road, Jadavpur, Kolkata-700032, India

Email: [bcps@iacs.res.in](mailto:bcps@iacs.res.in); Fax: (+91)3324734971

### Supporting information

#### 1.<sup>1</sup>H NMR, <sup>31</sup>P NMR and <sup>13</sup>C NMR, MALDI-MS Spectra:

<sup>1</sup>H NMR spectra of (S)-3-tert-butyl 4-methyl 2,2-dimethyloxazolidine-3,4-dicarboxylate (1)

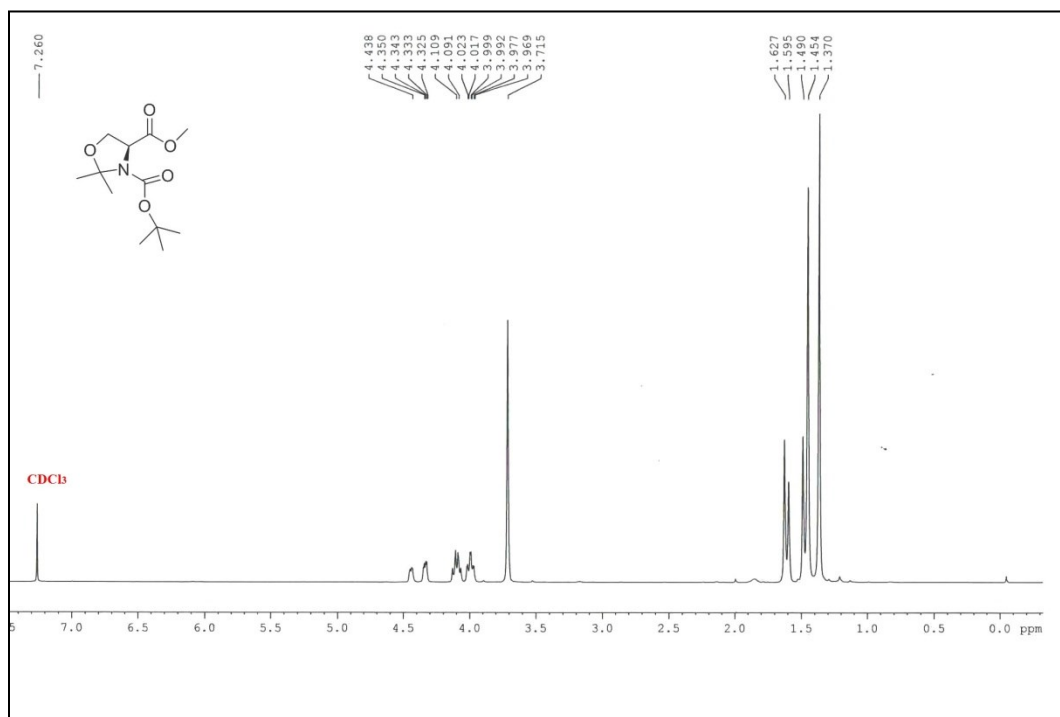

<sup>13</sup>C NMR Spectra of (S)-3-tert-butyl 4-methyl 2,2-dimethyloxazolidine-3,4-dicarboxylate (1)

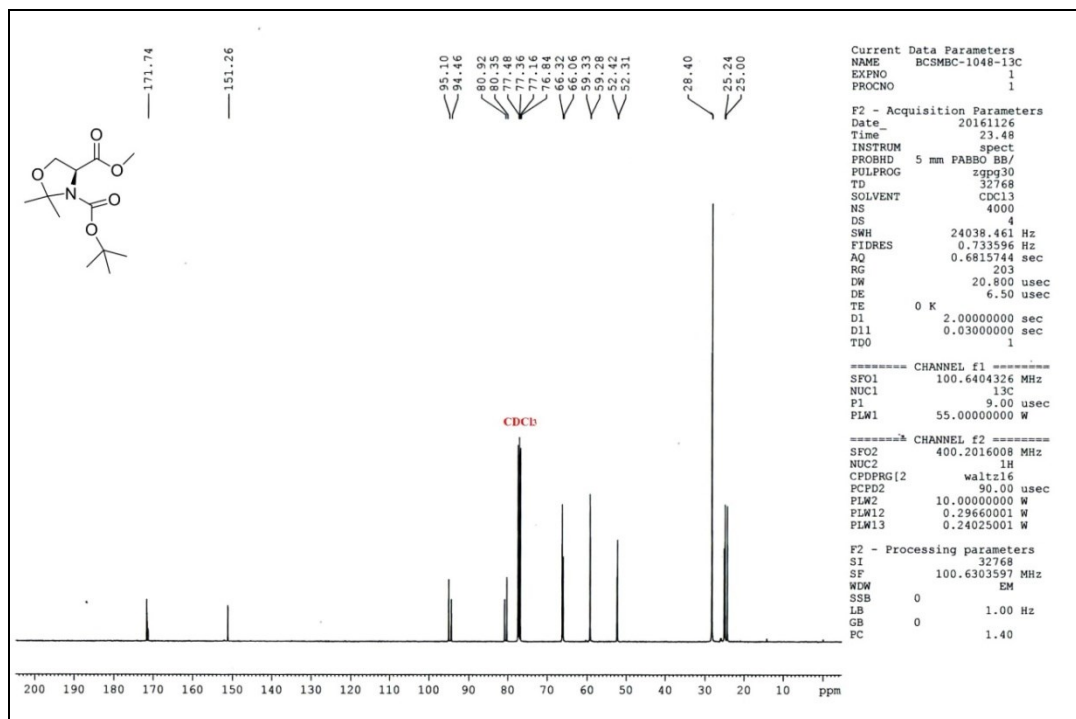

<sup>1</sup>H NMR spectra of (R)-tert-butyl 4-(hydroxymethyl)-2,2-dimethyloxazolidine-3-carboxylate ( 2 ):

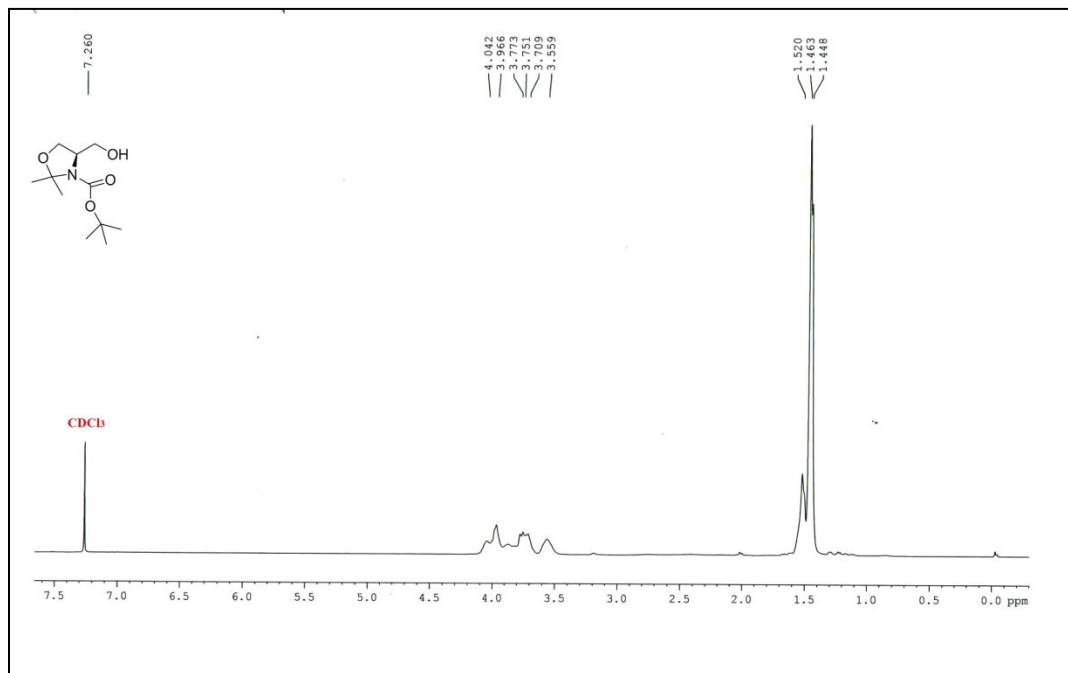

<sup>13</sup>C NMR Spectra of (R)-tert-butyl 4-(hydroxymethyl)-2,2-dimethyloxazolidine-3-carboxylate ( 2 ):

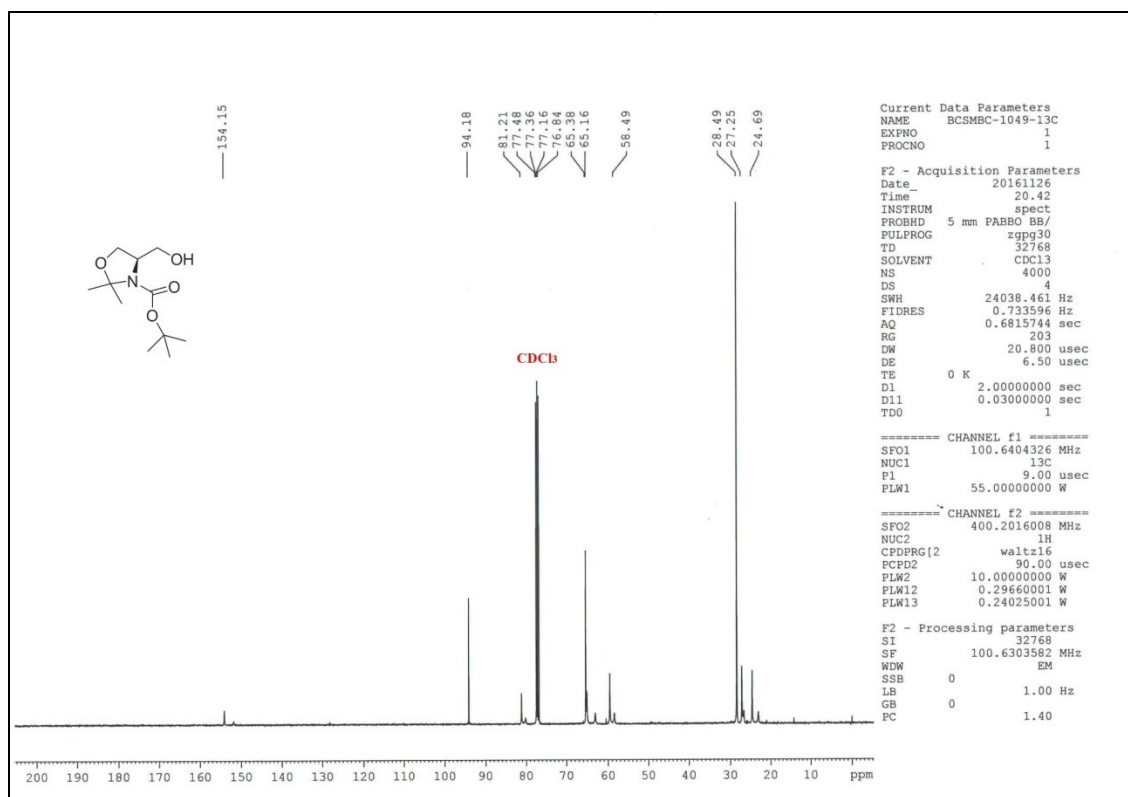

<sup>1</sup>H NMR spectra of (R,Z)-tert-butyl 4-((hexadec-8-en-1-yloxy)methyl)-2,2-dimethloxazolidine-3-carboxylate (3):

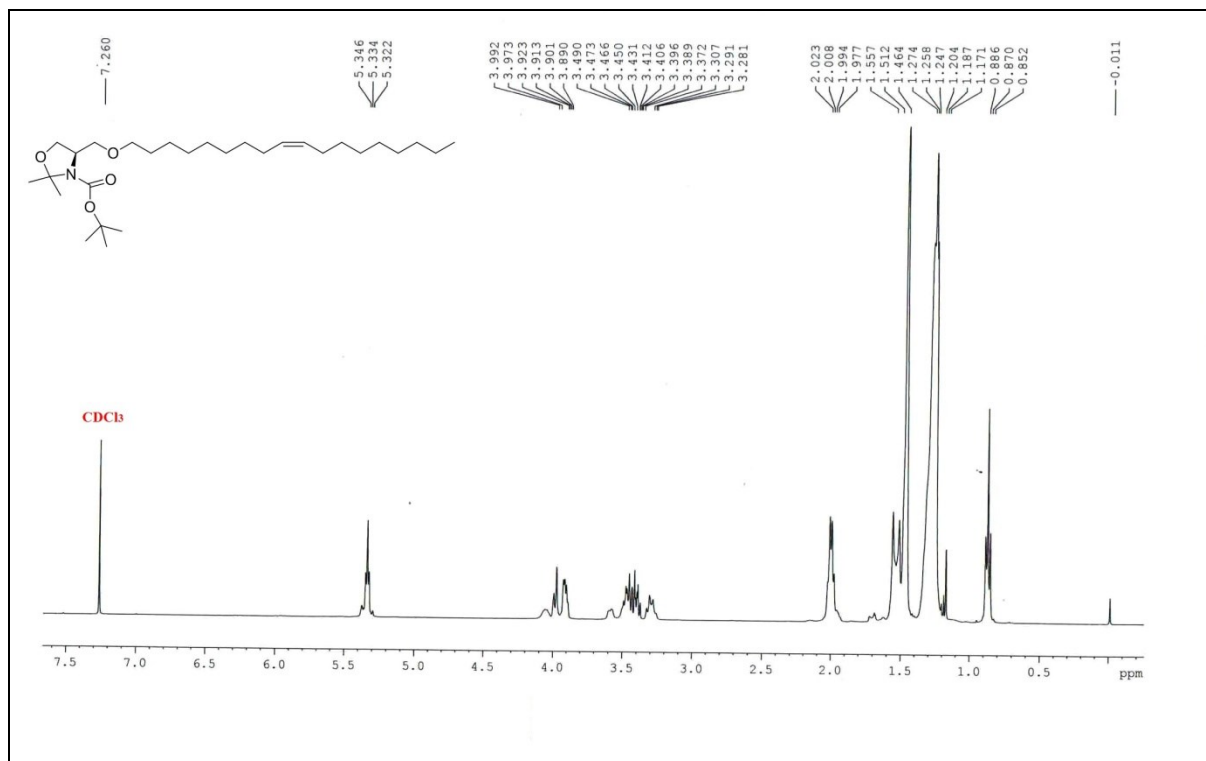

**<sup>13</sup>C NMR Spectra of (R,Z)-tert-butyl 4-((hexadec-8-en-1-yloxy)methyl)-2,2-dimethyloxazolidine-3-carboxylate (3):**

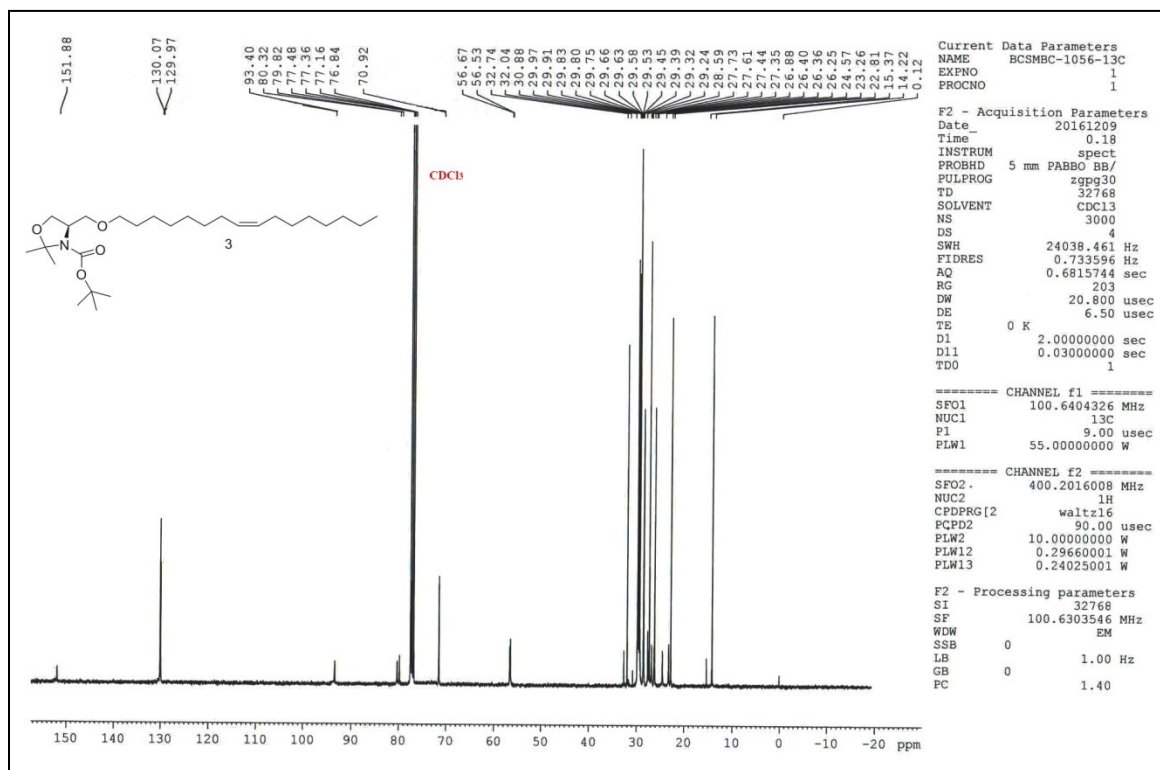

**<sup>1</sup>H NMR spectra of (S,Z)-2-amino-3-(octadec-9-en-1-yloxy)propan-1-ol**



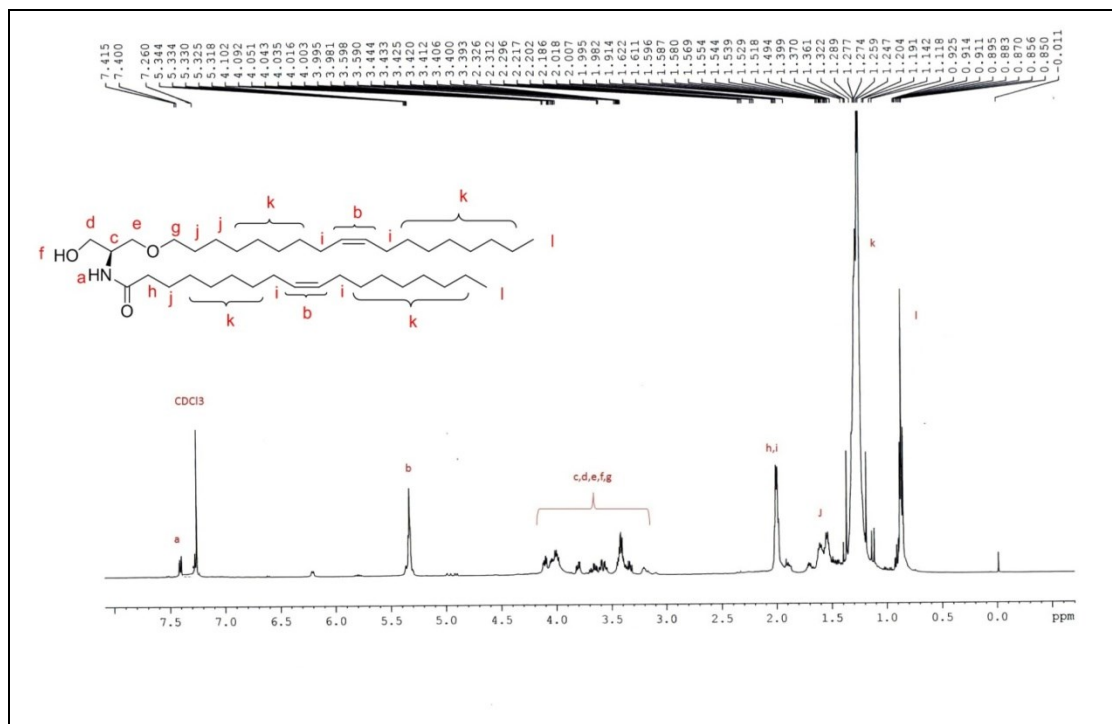

**<sup>13</sup>C NMR Spectra of N-((S)-1-hydroxy-3-((Z)-octadec-9-en-1-yloxy)propan-2-yl)oleamide(4):**

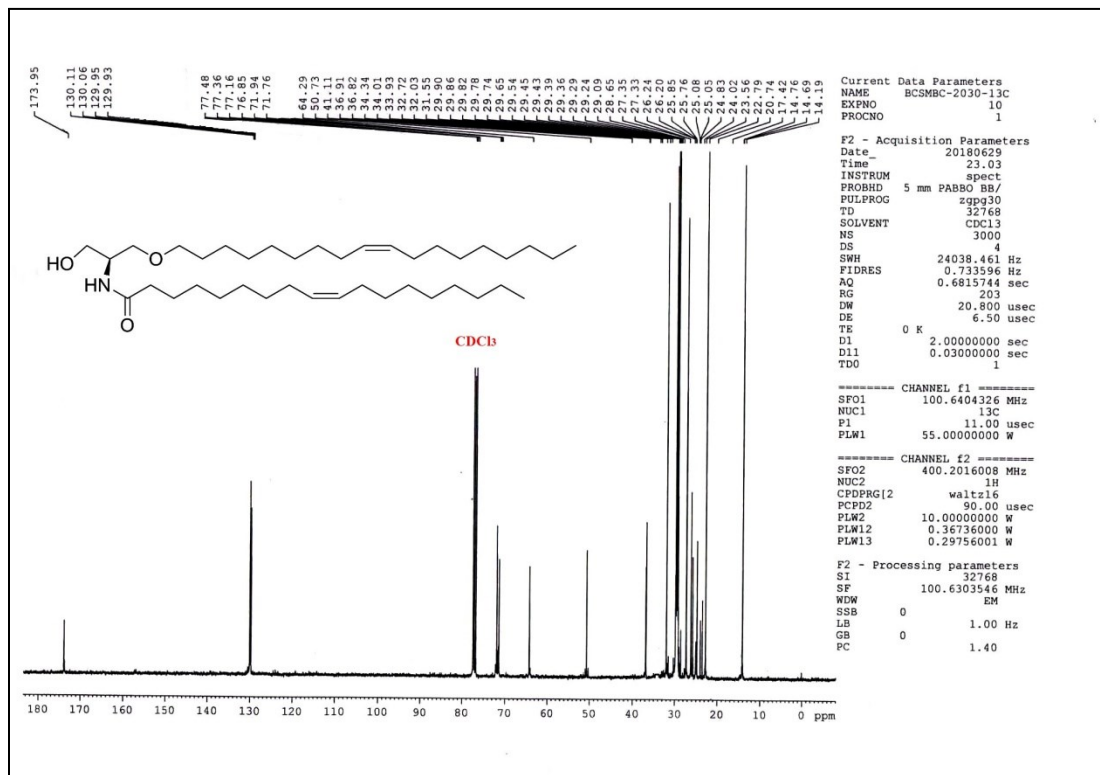

**MALDI-MS of N-((S)-1-hydroxy-3-((Z)-octadec-9-en-1-yloxy)propan-2-yl)oleamide(4):**

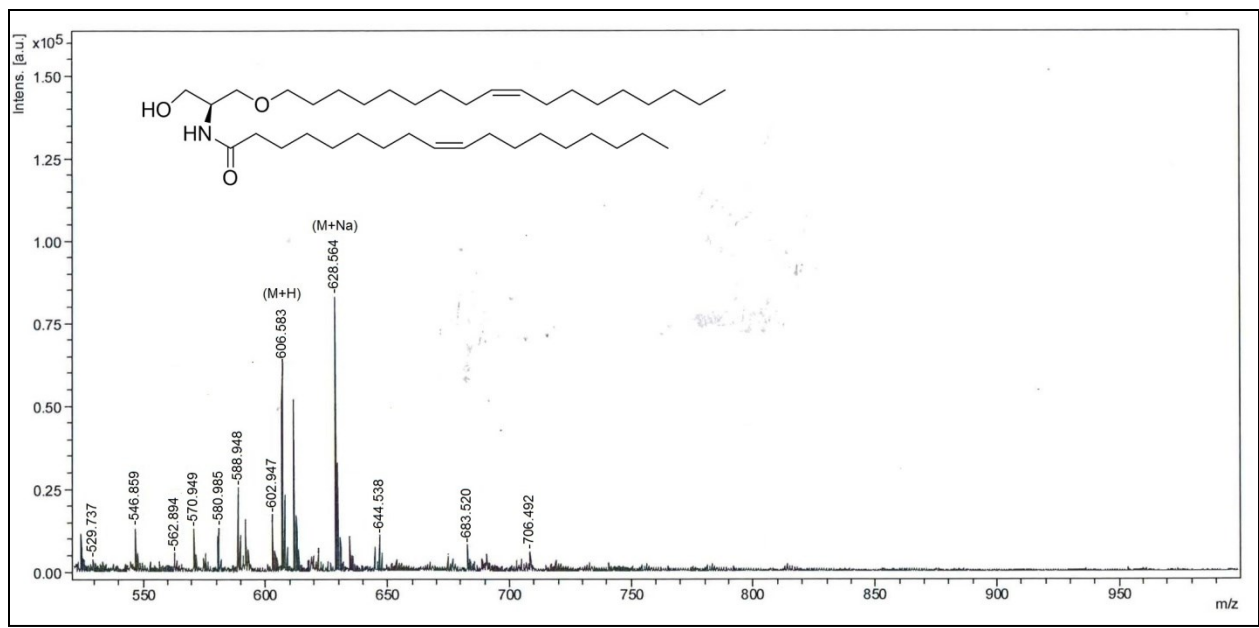

<sup>1</sup>H NMR spectra of Triethylammonium (R)-3-((Z)-octadec-9-en-1-yloxy)-2-oleamidopropyl phosphate(5):

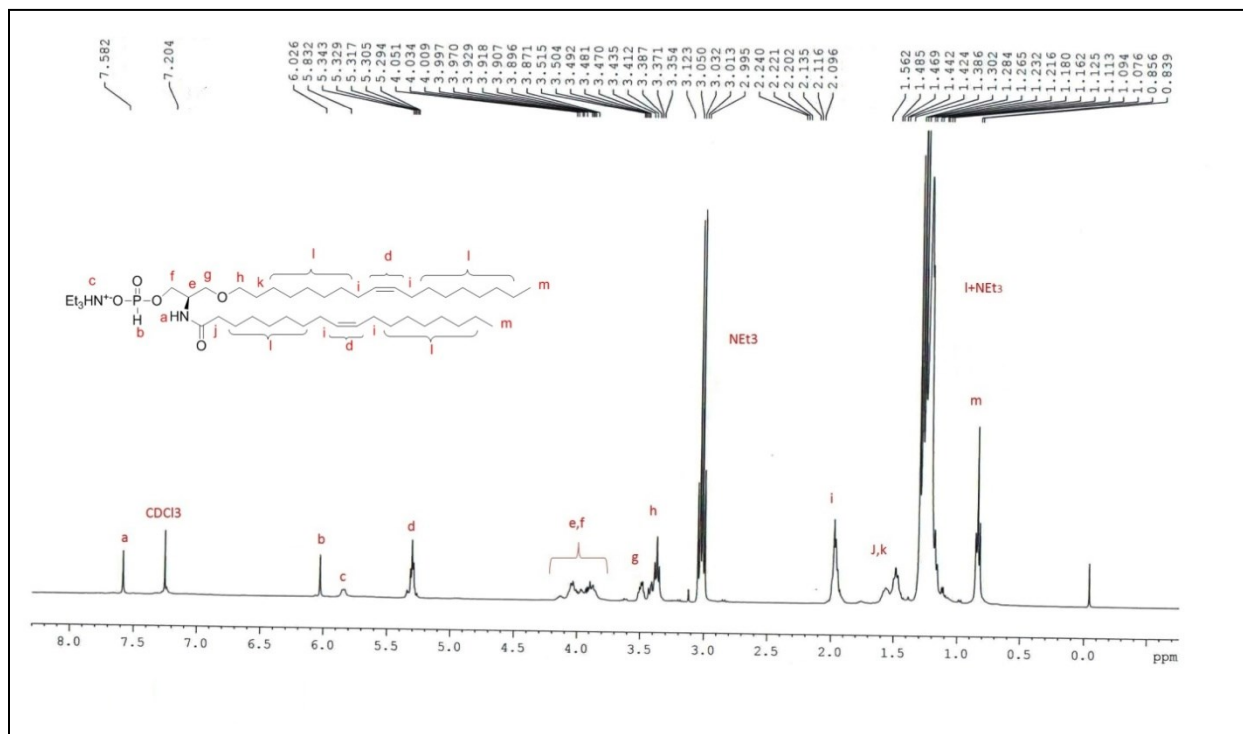

<sup>13</sup>C NMR Spectra of Triethylammonium (R)-3-((Z)-octadec-9-en-1-yloxy)-2-oleamidopropyl phosphate(5):

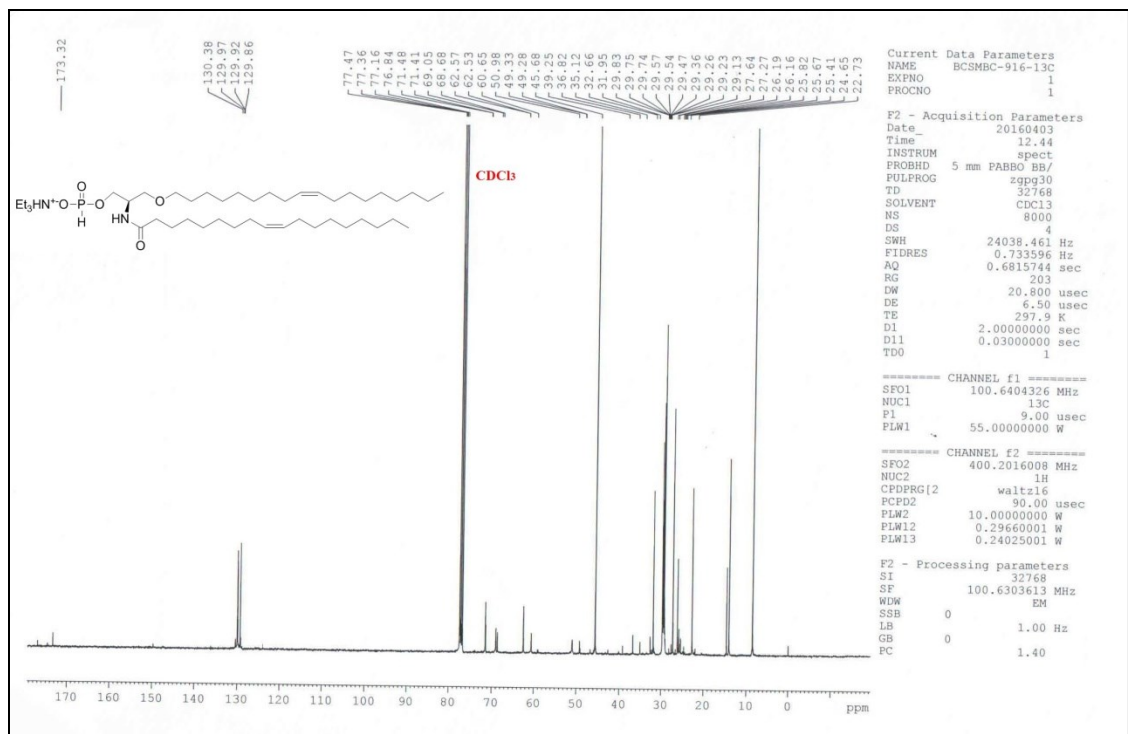

<sup>31</sup>P NMR Spectra of Triethylammonium (R)-3-((Z)-octadec-9-en-1-yloxy)-2-oleamidopropyl phosphate(5):

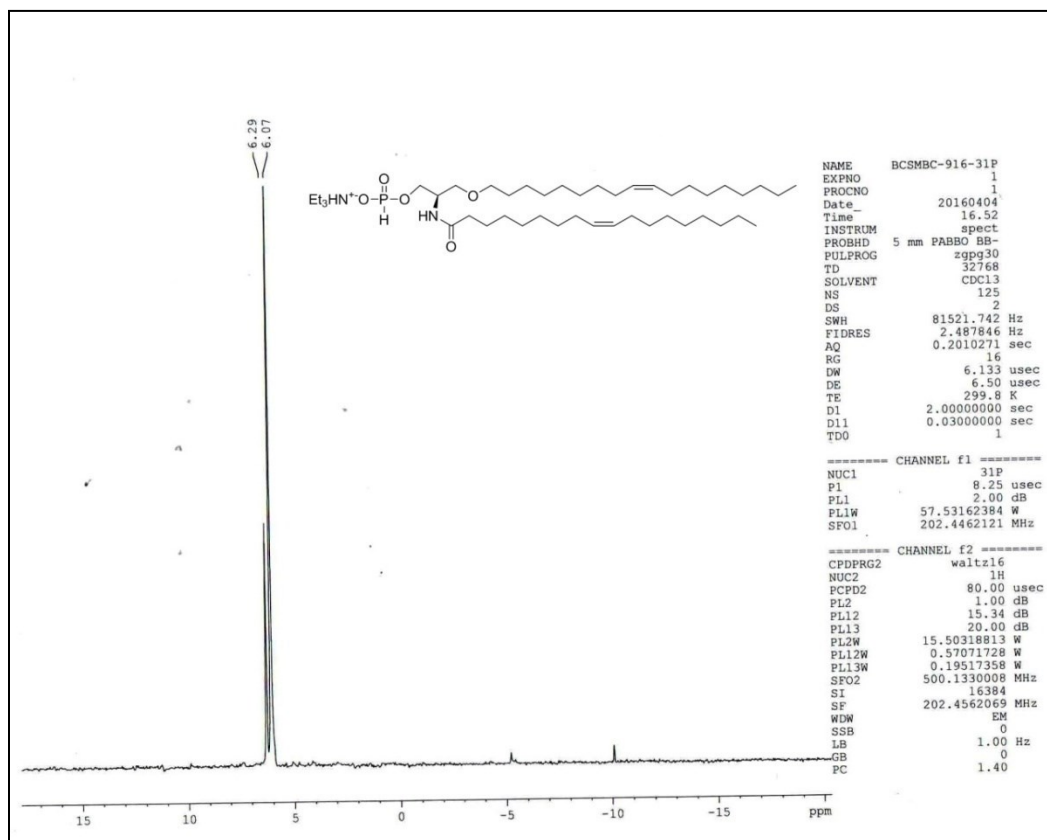

MALDI-MS of Triethylammonium (R)-3-((Z)-octadec-9-en-1-yloxy)-2-oleamidopropyl phosphate(5):



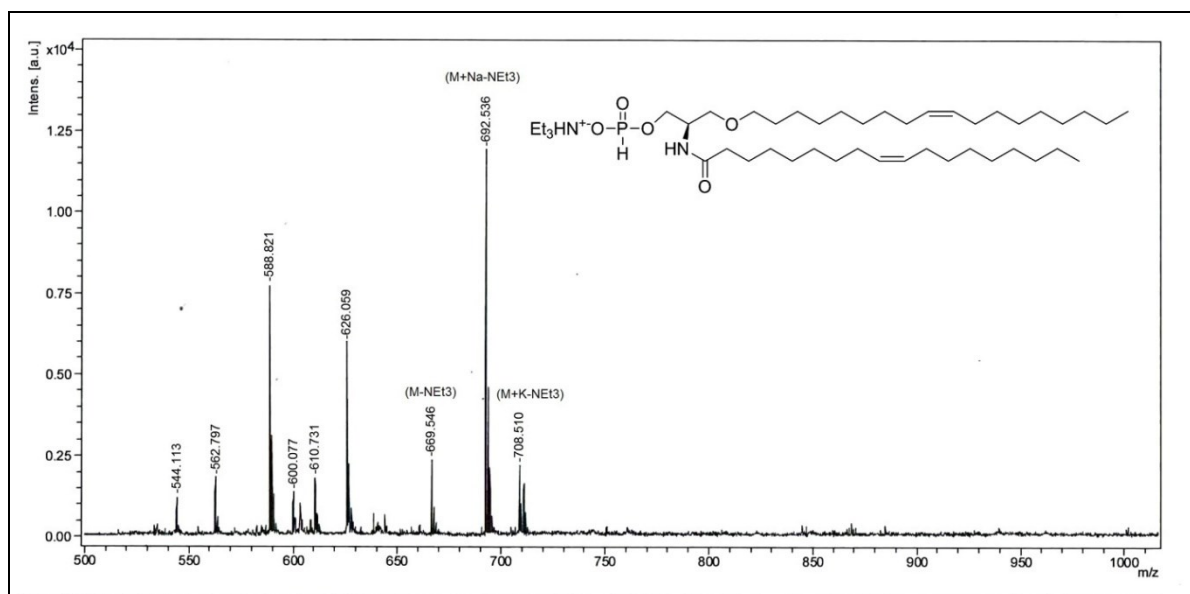

<sup>1</sup>H NMR spectra of (R)-3-((Z)-octadec-9-en-1-yloxy)-2-oleamidopropyl (2-(trimethylammonio)ethyl) phosphate(6)

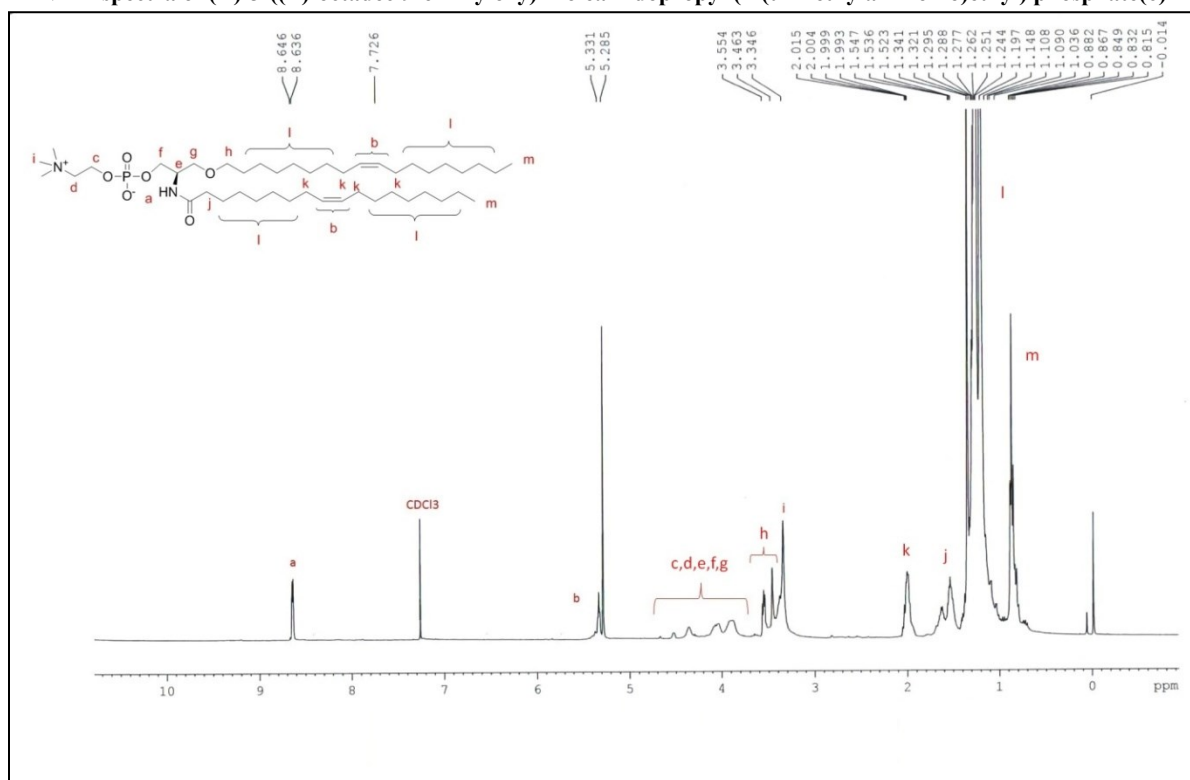

<sup>13</sup>C NMR Spectra of (R)-3-((Z)-octadec-9-en-1-yloxy)-2-oleamidopropyl (2-(trimethylammonio)ethyl) phosphate(6)

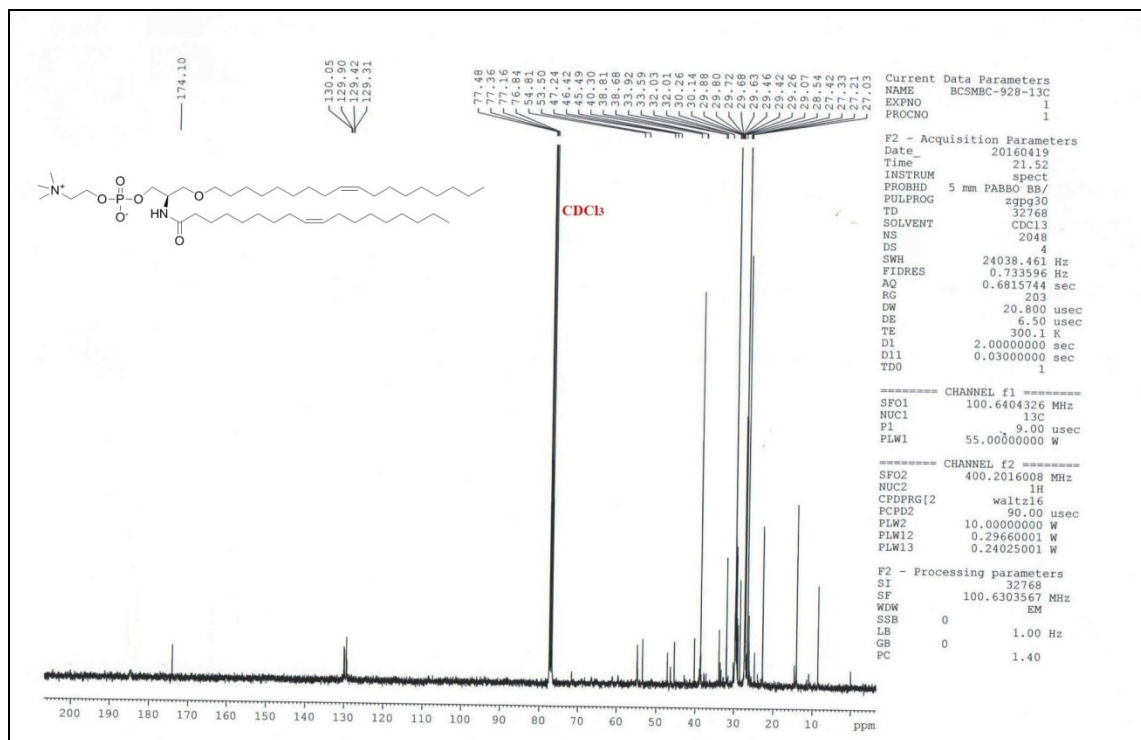

<sup>31</sup>P NMR Spectra of (R)-3-((Z)-octadec-9-en-1-yloxy)-2-oleamidopropyl (2-(trimethylammonio)ethyl) phosphate(6)

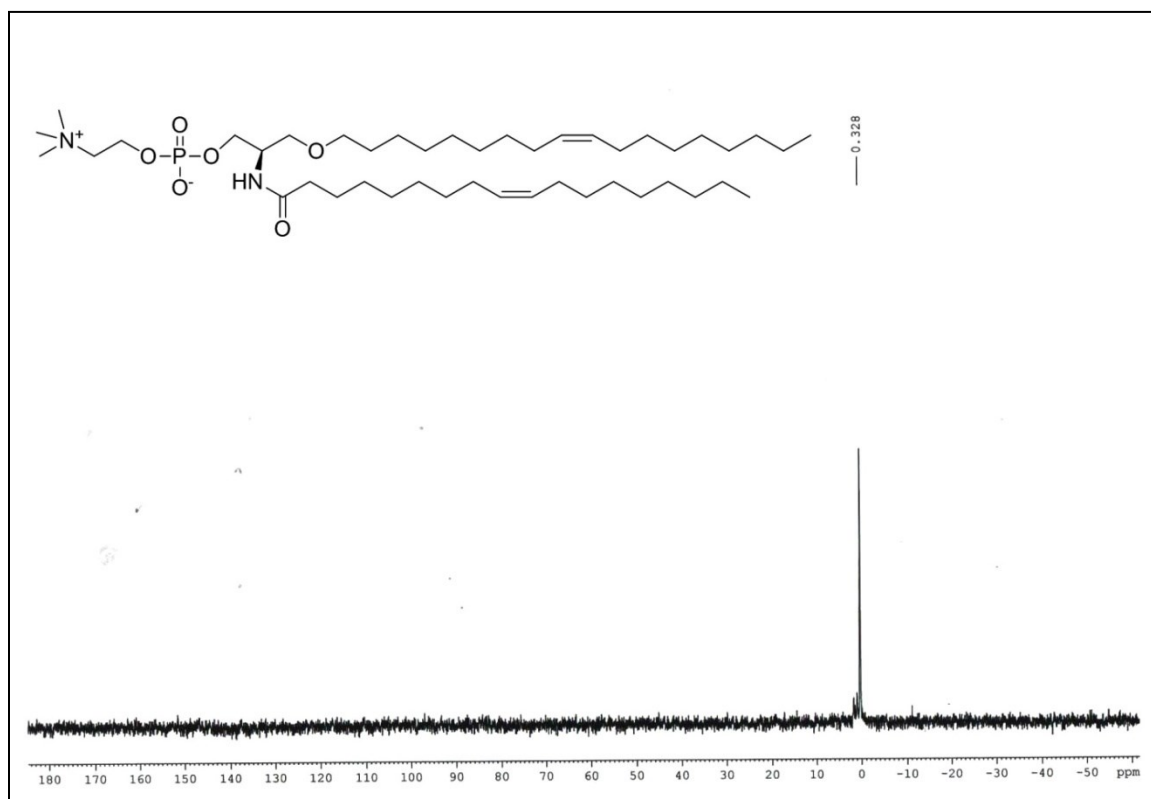

MALDI-MS of (R)-3-((Z)-octadec-9-en-1-yloxy)-2-oleamidopropyl (2-(trimethylammonio)ethyl) phosphate(6)

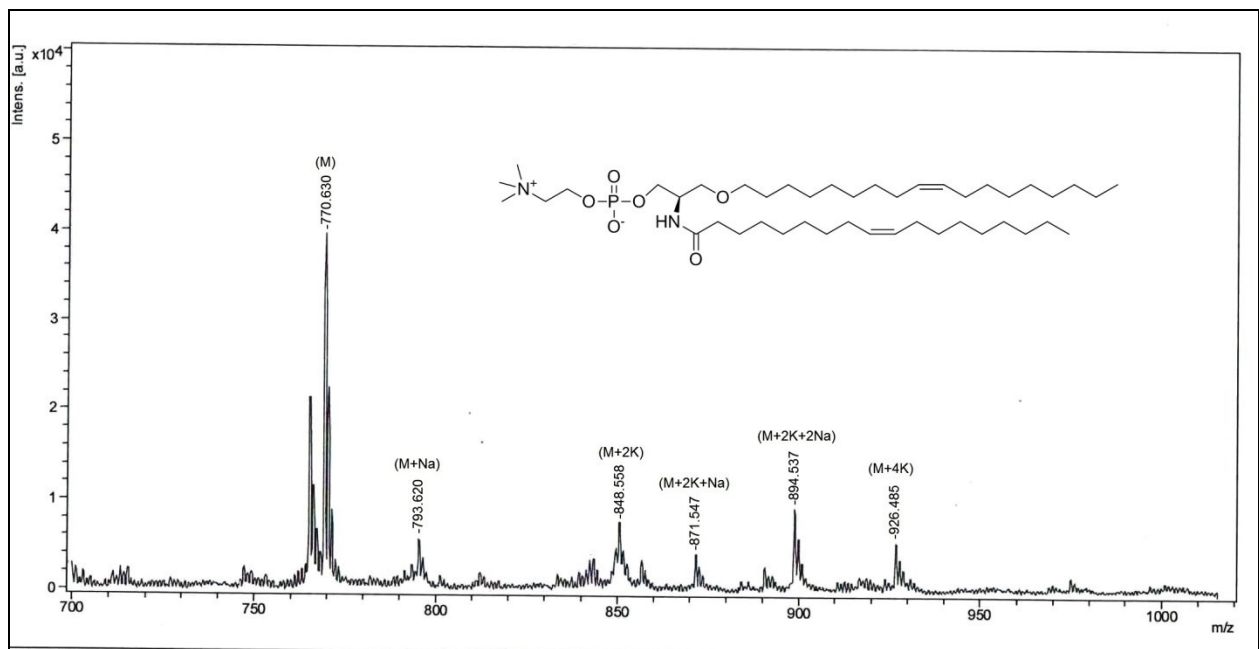

Supplement: d0ra09218e1.pdf [file d0ra09218e1.pdf]
